# Supplementary material for: Exome sequencing identifies MLL2 mutations as a cause of Kabuki syndrome
Source: Springer Nature journal article supplement (doi:10.1038/ng.646), 2010-08-15
Supplement: 41588_2010_BFng646_MOESM15_ESM.pdf [file 41588_2010_BFng646_MOESM15_ESM.pdf]

## Exome sequencing identifies *MLL2* mutations as a cause of Kabuki syndrome

Sarah B. Ng<sup>1\*</sup>, Abigail W. Bigham<sup>2\*</sup>, Kati J. Buckingham<sup>2</sup>, Mark C. Hannibal<sup>2,3</sup>, Margaret McMillin<sup>2</sup>, Heidi Gildersleeve<sup>2</sup>, Anita E. Beck<sup>2,3</sup>, Holly K. Tabor<sup>2,3</sup>, Greg M. Cooper<sup>1</sup>, Heather C. Mefford<sup>2</sup>, Choli Lee<sup>1</sup>, Emily H. Turner<sup>1</sup>, Josh D. Smith<sup>1</sup>, Mark J. Rieder<sup>1</sup>, Koh-ichiro Yoshiura<sup>4</sup>, Naomichi Matsumoto<sup>5</sup>, Tohru Ohta<sup>6</sup>, Norio Niikawa<sup>6</sup>, Deborah A. Nickerson<sup>1</sup>, Michael J. Bamshad<sup>1,2,3†</sup>, Jay Shendure<sup>1†</sup>

Departments of <sup>1</sup>Genome Sciences and <sup>2</sup>Pediatrics, University of Washington, Seattle, Washington, USA. <sup>3</sup>Seattle Children's Hospital, Seattle, Washington, USA. <sup>4</sup>Department of Human Genetics, Nagasaki University Graduate School of Biomedical Sciences, Nagasaki, Japan. <sup>5</sup>Department of Human Genetics, Yokohama City University Graduate School of Medicine, Yokohama, Japan. <sup>6</sup>Research Institute of Personalized Health Sciences, Health Sciences University of Hokkaido, Hokkaido, Japan

### Supplementary Figures 1-3 and Supplementary Tables 1-3

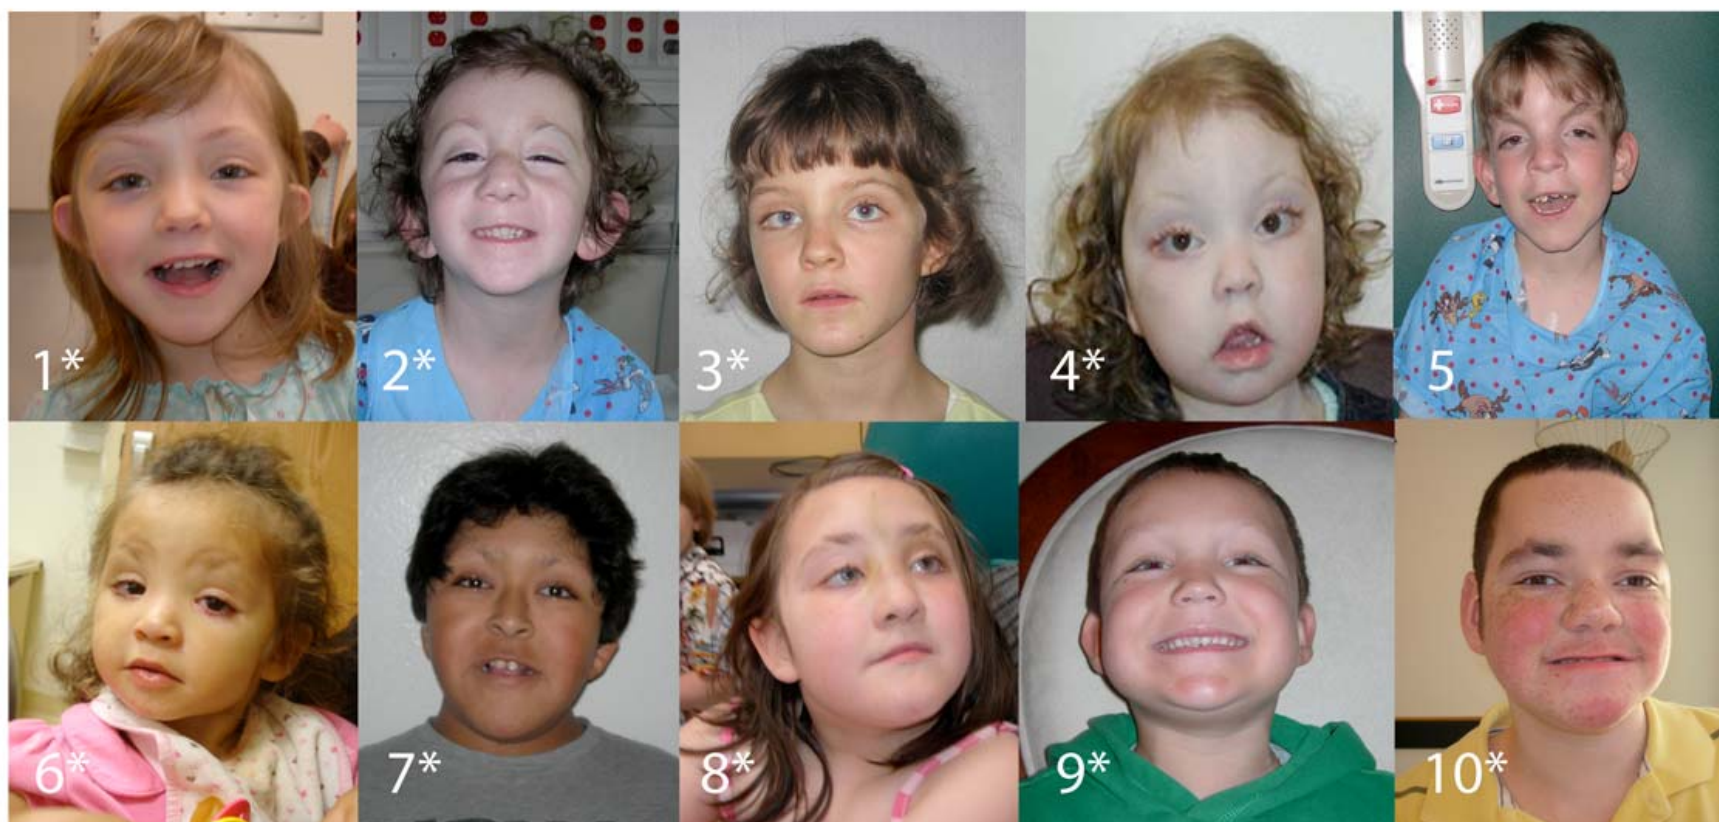

**Supplementary Figure 1. Photographs of the facial characteristics used to determine the subjective ranking of Kabuki phenotypes.** The phenotype ranking of the ten children with Kabuki syndrome is listed here from 1-10 based on similarity to the canonical phenotype of Kabuki syndrome. Asterisks indicate cases in which *MLL2* mutations were identified. Informed consent was obtained for publication of each of the facial photos shown.

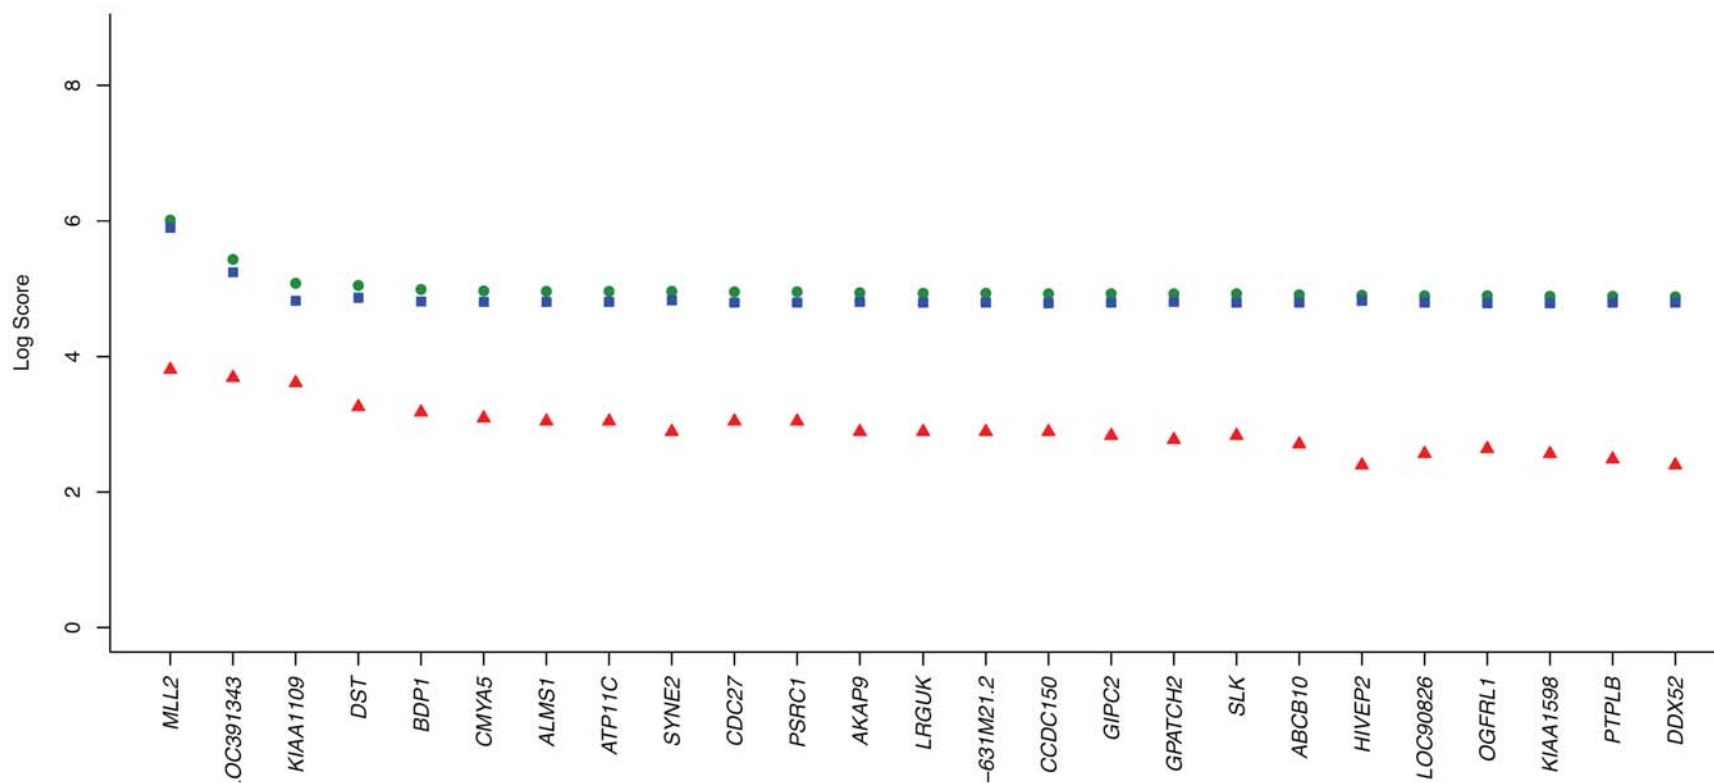

**Supplementary Figure 2. Ranking of candidate genes identified by exome sequencing based on shared variants and functional annotation.** Plot of the log of the top twenty-five candidate gene scores (green circles) in 10 Kabuki cases ranked by sum of case score (red triangles) and variant score (blue squares).

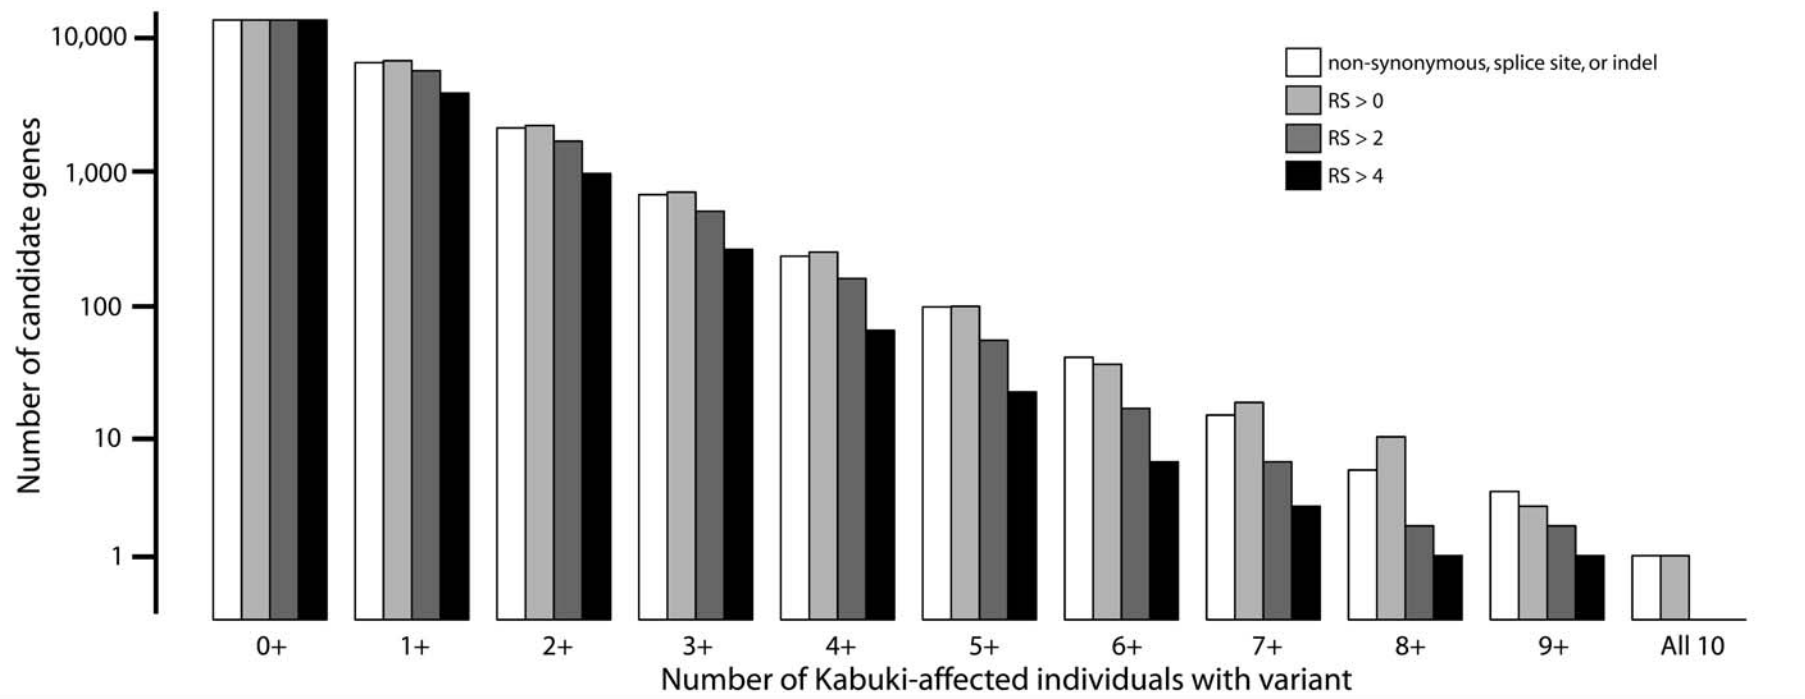

|                   |        |       |       |     |     |     |    |    |    |    |    |
|-------------------|--------|-------|-------|-----|-----|-----|----|----|----|----|----|
| <i>MLL2</i> rank: | 3,732  | 3,732 | 1,232 | 399 | 136 | 47  | 14 | 6  | 3  | NA | NA |
| Total (RS > 0):   | 14,407 | 7,176 | 2,360 | 754 | 269 | 106 | 39 | 20 | 11 | 3  | 1  |

**Supplementary Figure 3. Constraint scores enrich candidate gene pool for variants causing Kabuki syndrome.** Number of candidate genes in which at least the given number of individuals with Kabuki syndrome has a rare variant that is functionally defined or with RS scores as indicated. Total number of candidate genes identified at RS > 0 and rank of *MLL2* among those genes are also given.

**Supplementary Table 1.** Clinical characteristics used to determine the subjective phenotype ranking of the 10 children with Kabuki syndrome.

|    | Cardiovascular                                            | Spleen/Liver abnormality | Kidney abnormality | Kidney dysfunction | Hearing loss | Preauricular pits/tags | Cleft palate | High arched palate | Hypotonia | Developmental delay |
|----|-----------------------------------------------------------|--------------------------|--------------------|--------------------|--------------|------------------------|--------------|--------------------|-----------|---------------------|
| 1  | ASD/VSD, aortic coarctation, bicuspid valves, dysrhythmia | np                       | X                  | np                 | X            | X                      | X            | X                  | X         | X                   |
| 2  | aortic coarctation, bicuspid valves                       | -                        | X                  | X                  | X            | X                      | X            | X                  | X         | X                   |
| 3  | ASD/VSD, aortic coarctation, bicuspid valves              | -                        | -                  | -                  | X            | np                     | np           | X                  | X         | X                   |
| 4  | VSD, aortic coarctation                                   | X                        | np                 | np                 | X            | -                      | X            | X                  | X         | X                   |
| 5  | ASD, VSD                                                  | np                       | np                 | np                 | np           | np                     | X            | X                  | X         | X                   |
| 6  | np                                                        | np                       | np                 | np                 | -            | np                     | np           | X                  | X         | X                   |
| 7  | np                                                        | -                        | X                  | -                  | X            | np                     | np           | X                  | X         | X                   |
| 8  | np                                                        | X                        | X                  | np                 | np           | X                      | X            | X                  | X         | X                   |
| 9  | np                                                        | np                       | np                 | np                 | np           | np                     | np           | np                 | np        | X                   |
| 10 | ASD, VSD, dysrhythmia                                     | X                        | X                  | X                  | X            | np                     | np           | X                  | X         | X                   |

X denotes abnormality present

np denotes abnormality not present

- denotes data not found in medical record

**Supplementary Table 2.** Lists of certain candidate genes as identified in Table 1 and 2.

Gene names given for cells in Table 1 where number of genes < 20

| <b>A. Subset analysis<br/>(any x of 10)</b>             | <b>1</b> | <b>2</b> | <b>3</b>                                                             | <b>4</b>                          | <b>5</b>             | <b>6</b>             | <b>7</b>                                                                                                                                                | <b>8</b>                                                  | <b>9</b>                                                                | <b>10</b>             |
|---------------------------------------------------------|----------|----------|----------------------------------------------------------------------|-----------------------------------|----------------------|----------------------|---------------------------------------------------------------------------------------------------------------------------------------------------------|-----------------------------------------------------------|-------------------------------------------------------------------------|-----------------------|
| NS/SS/I                                                 | 12,042   | 8,722    | 7,084                                                                | 6,049                             | 5,289                | 4,581                | 3,940                                                                                                                                                   | 3,244                                                     | 2,486                                                                   | 1,459                 |
| Not in dbSNP129<br>or 1000 genomes                      | 7,419    | 2,697    | 1,057                                                                | 488                               | 288                  | 192                  | 128                                                                                                                                                     | 88                                                        | 60                                                                      | 34                    |
| Not in control<br>exomes                                | 7,827    | 2,865    | 1,025                                                                | 399                               | 184                  | 90                   | 50                                                                                                                                                      | 22                                                        | 7<br>MUC2,<br>LIN37,<br>MUC6,<br>AHNAK2,<br>UGT2B10,<br>MUC16,<br>MUC5B | 2<br>MUC16,<br>AHNAK2 |
| Not in either                                           | 6,935    | 2,227    | 701                                                                  | 242                               | 104                  | 44                   | 16<br>AHNAK2, MUC2, EVPL,<br>LOC100128468, MUC6,<br>MLL2, PCDHGB1, DSPP,<br>LOC391343, MYCBP2,<br>PCDHGA3, PCDHGA2,<br>MUC16, PCDHGA1, LYST,<br>PKHD1L1 | 6<br>MUC2,<br>MUC6,<br>DSPP,<br>MUC16,<br>AHNAK2,<br>LYST | 3<br>MUC16,<br>AHNAK2,<br>MUC2                                          | 1<br>MUC16            |
| Is loss-of-function<br>(nonsense /<br>frameshift indel) | 753      | 49       | 7<br>FLJ34443,<br>GJB4, MLL3,<br>MLL2, SQLE,<br>LOC391343,<br>ZNF598 | 3<br>MLL2,<br>ZNF598,<br>FLJ34443 | 2<br>MLL2,<br>ZNF598 | 2<br>MLL2,<br>ZNF598 | 1<br>MLL2                                                                                                                                               | 0                                                         | 0                                                                       | 0                     |

**Supplementary Table 2 continued.** Lists of certain candidate genes as identified in Table 1 and 2.

Gene names given for cells in Table 2 where number of genes < 20

| <b>B. Sequential analysis</b>                     | <b>1</b> | <b>+ 2</b> | <b>+ 3</b> | <b>+ 4</b>                                                                                                                                | <b>+ 5</b>                                                                                                   | <b>+ 6</b>                                                                                                   | <b>+ 7</b>                                                     | <b>+ 8</b>                            | <b>+ 9</b>                     | <b>+ 10</b>        |
|---------------------------------------------------|----------|------------|------------|-------------------------------------------------------------------------------------------------------------------------------------------|--------------------------------------------------------------------------------------------------------------|--------------------------------------------------------------------------------------------------------------|----------------------------------------------------------------|---------------------------------------|--------------------------------|--------------------|
| NS/SS/I                                           | 5,282    | 3,850      | 3,250      | 2,354                                                                                                                                     | 2,028                                                                                                        | 1,899                                                                                                        | 1,772                                                          | 1,686                                 | 1,600                          | 1,459              |
| Not in dbSNP129 or 1000 genomes                   | 687      | 214        | 145        | 84                                                                                                                                        | 63                                                                                                           | 54                                                                                                           | 42                                                             | 40                                    | 39                             | 34                 |
| Not in control exomes                             | 675      | 134        | 50         | 26                                                                                                                                        | 13<br>OBSCN, LIN37, MUC16, PCDHGB1, PCDHGA2, PCDHGA3, PCDHGA1, PCDHGA4, MUC2, MUC6, UGT2B10, AHNAK2, PKHD1L1 | 13<br>OBSCN, LIN37, MUC16, PCDHGB1, PCDHGA2, PCDHGA3, PCDHGA1, PCDHGA4, MUC2, MUC6, UGT2B10, AHNAK2, PKHD1L1 | 8<br>OBSCN, LIN37, MUC16, MUC2, MUC6, UGT2B10, AHNAK2, PKHD1L1 | 5<br>LIN37, MUC16, MUC2, MUC6, AHNAK2 | 4<br>MUC16, MUC2, MUC6, AHNAK2 | 2<br>MUC16, AHNAK2 |
| Not in either                                     | 467      | 89         | 34         | 18<br>SRRM2, ATG2B, VPS13A, FNDC1, MLL2, MUC4, UBR1, MUC16, PCDHGB1, PCDHGA2, PCDHGA3, PCDHGA1, LYST, A26C1A, MUC2, MUC6, AHNAK2, PKHD1L1 | 9<br>MUC16, PCDHGB1, PCDHGA2, PCDHGA3, PCDHGA1, MUC2, MUC6, AHNAK2, PKHD1L1                                  | 8<br>MUC16, PCDHGB1, PCDHGA2, PCDHGA3, PCDHGA1, MUC2, MUC6, AHNAK2                                           | 4<br>MUC16, MUC2, MUC6, AHNAK2                                 | 4<br>MUC16, MUC2, MUC6, AHNAK2        | 3<br>MUC16, MUC2, AHNAK2       | 1<br>MUC16         |
| Is loss-of-function (nonsense / frameshift indel) | 25       | 1<br>MLL2  | 1<br>MLL2  | 1<br>MLL2                                                                                                                                 | 0                                                                                                            | 0                                                                                                            | 0                                                              | 0                                     | 0                              | 0                  |

**Supplementary Table 3.** Annotation of all *MLL2* mutations found in 53 Kabuki cases screened.

| Kindred | Indiv | Exome Sequenced | Mutation             | Exon | Predicted Amino Acid Change | Confirmed as <i>de novo</i> | Position <sup>a</sup> |
|---------|-------|-----------------|----------------------|------|-----------------------------|-----------------------------|-----------------------|
| 1       |       | yes             | c.G15195A            | 48   | p.W5065X                    | +                           | chr12:47706821        |
| 2       |       | yes             | c.C6010T             | 28   | p.Q2004X                    | +                           | chr12:47722238        |
| 3       |       | yes             | c.C12697T            | 39   | p.Q4233X                    | +                           | chr12:47712058        |
| 4       |       | yes             | c.C8488T             | 34   | p.R2830X                    | -                           | chr12:47718918        |
| 5       |       | yes             | --                   | --   | --                          | --                          | --                    |
| 6       |       | yes             | c.11794_11797delCAAC | 39   | p.Q3932SfsX46               | +                           | chr12:47712958-61     |
| 7       |       | yes             | c.T15618G            | 48   | p.Y5206X                    | +                           | chr12:47706398        |
| 8       |       | yes             | c.3585_3586insA      | 11   | p.P1196TfsX11               | +                           | chr12:47730053-54     |
| 9       |       | yes             | c.C6295T             | 31   | p.R2099X                    | +                           | chr12:47721525        |
| 10      |       | yes             | c.6595delT           | 31   | p.Y2199IfsX65               | +                           | chr12:47721225        |
| 11      |       | no              | c.G15326T            | 48   | p.C5109F                    | +                           | chr12:47706690        |
| 12      |       | no              | c.G15536A            | 48   | p.R5179H                    | +                           | chr12:47706480        |
| 13      |       | no              | c.C11149T            | 39   | p.Q3717X                    | +                           | chr12:47713606        |
| 14      |       | no              | c.15444_15445delTT   | 48   | p.F5149CfsX9                | -                           | chr12:47706571-72     |
| 15      |       | no              | c.C15217T            | 48   | p.Q5073X                    | -                           | chr12:47706799        |
| 16      |       | no              | c.C9961T             | 34   | p.R3321X                    | -                           | chr12:47717445        |
| 17      |       | no              | c.C14710T            | 48   | p.R4904X                    | -                           | chr12:47707306        |
| 18      |       | no              | c.5875_5891dup17     | 28   | p.E1965GfsX88               | -                           | chr12:47722341-57     |
| 19      |       | no              | c.G15536A            | 48   | p.R5179H                    | -                           | chr12:47706480        |
| 20      |       | no              | c.C12703T            | 39   | p.Q4235X                    | -                           | chr12:47712152        |
| 21      |       | no              | c.C12241T            | 39   | p.Q4081X                    | -                           | chr12:47712514        |
| 22      |       | no              | c.C13390T            | 39   | p.Q4464X                    | +                           | chr12:47711365        |
| 23      |       | no              | c.G15641A            | 48   | p.R5214H                    | -                           | chr12:47706375        |
| 24      |       | no              | --                   | --   | --                          | --                          | --                    |
| 25      | 1     | no              | c.A13580T            | 40   | p.K4527X                    | *                           | chr12:47711035        |
|         | 2     | no              | c.A13580T            | 40   | p.K4527X                    | -                           | chr12:47711035        |
| 26      |       | no              | c.C16501T            | 53   | p.R5501X                    | -                           | chr12:47702113        |
| 27      | 1     | no              | --                   | --   | --                          | --                          | --                    |
|         | 2     | no              | --                   | --   | --                          | --                          | --                    |
| 28      |       | no              | --                   | --   | --                          | --                          | --                    |
| 29      |       | no              | c.C10738T            | 38   | p.Q3580X                    | -                           | chr12:47714119        |
| 30      |       | no              | --                   | --   | --                          | --                          | --                    |
| 31      |       | no              | c.C16360T            | 52   | p.R5454X                    | -                           | chr12:47702382        |
| 32      |       | no              | --                   | --   | --                          | --                          | --                    |
| 33      |       | no              | --                   | --   | --                          | --                          | --                    |
| 34      |       | no              | --                   | --   | --                          | --                          | --                    |
| 35      |       | no              | c.4956_4957insG      | 19   | p.E1654X                    | -                           | chr12:47724800-01     |
| 36      |       | no              | c.10599_10630del32   | 38   | p.V3534QfsX11               | -                           | chr12:47714227-58     |
| 37      |       | no              | --                   | --   | --                          | --                          | --                    |
| 38      |       | no              | c.C13606T            | 40   | p.R4536X                    | -                           | chr12:47711008        |
| 39      |       | no              | c.G16019T            | 50   | p.R5340L                    | -                           | chr12:47704661        |
| 40      |       | no              | c.C4843T             | 19   | p.R1615X                    | -                           | chr12:47724914        |
| 41      |       | no              | c.C16391T            | 52   | p.T5464M                    | -                           | chr12:47702351        |
| 42      |       | no              | --                   | --   | --                          | --                          | --                    |
| 43      |       | no              | --                   | --   | --                          | --                          | --                    |
| 44      |       | no              | --                   | --   | --                          | --                          | --                    |
| 45      |       | no              | c.C16360T            | 52   | p.R5454X                    | -                           | chr12:47702382        |
| 46      |       | no              | --                   | --   | --                          | --                          | --                    |
| 47      |       | no              | --                   | --   | --                          | --                          | --                    |
| 48      |       | no              | --                   | --   | --                          | --                          | --                    |
| 49      |       | no              | --                   | --   | --                          | --                          | --                    |
| 50      |       | no              | c.1324delC           | 10   | p.P442HfsX487               | -                           | chr12:47732409        |
| 51      |       | no              | --                   | --   | --                          | --                          | --                    |
| 52      | 1     | no              | c.C16391T            | 52   | p.T5464M                    | *                           | chr12:47702351        |
|         | 2     | no              | c.C16391T            | 52   | p.T5464M                    | -                           | chr12:47702351        |
| 53      |       | no              | --                   | --   | --                          | --                          | --                    |

-- no mutation identified

+ confirmed *de novo*

- no parental samples available

X stop codon

fs frameshift

<sup>a</sup> chromosomal position was determined using March 2006 assembly from UCSC (hg18)

\* confirmed as inherited

Kindreds 25, 27 and 52 show dominant transmission of Kabuki syndrome from parent to child. Both affected individuals are listed here.
